# Supplementary material
Source: PubMed Central journal article supplement (PMC4594724)
Supplement: bcp0080-0818-sd1.pdf [file bcp0080-0818-sd1.pdf]

**Supplementary Table S1. Description of sites**

|                                                                                                  | <b>Location</b>                                | <b>Type of hospital</b>                       | <b>Wards included / excluded</b>                                                                                                                                                                                                           |
|--------------------------------------------------------------------------------------------------|------------------------------------------------|-----------------------------------------------|--------------------------------------------------------------------------------------------------------------------------------------------------------------------------------------------------------------------------------------------|
| <b>Groote Schuur Hospital</b>                                                                    | Cape Town, Western Cape province               | Tertiary teaching hospital                    | We included patients who died in the general medical wards and the short-stay medical ward, and excluded those who died in subspeciality wards and intensive care units.                                                                   |
| <b>Edendale Hospital</b>                                                                         | Edendale, KwaZulu-Natal province               | Regional teaching hospital                    | We included patients who died in the general medical wards and excluded those who died in the intensive care unit. Edendale Hospital does not have subspeciality or short-stay medical wards.                                              |
| <b>Cecilia Makiwane Hospital and Frere Hospital (co-managed as East London Hospital Complex)</b> | Mdantsane / East London, Eastern Cape province | Regional / tertiary teaching hospital complex | We included all patients who died in the general medical wards as well as medical patients who died in the high care and intensive care units. Cecilia Makiwane and Frere Hospitals do not have subspeciality or short-stay medical wards. |

**Supplementary Table S2. Characteristics of the 56 patients considered to have died from an ADR-related cause and details of their ADRs**

| No | Age | Sex | HIV | Adverse drug reaction(s)         | Implicated drug(s)                                   | WHO causality category | Relation of ADR to death | Preventable |
|----|-----|-----|-----|----------------------------------|------------------------------------------------------|------------------------|--------------------------|-------------|
| 1  | 28  | F   | Pos | Renal failure with hyperkalaemia | Spirololactone                                       | Possible               | A contributor            | Yes         |
| 2  | 25  | M   | Pos | Renal failure with hypocalcaemia | Tenofovir                                            | Possible               | A contributor            | Yes         |
| 3  | 30  | M   | Pos | Renal failure                    | Tenofovir                                            | Possible               | A contributor            | No          |
| 4  | 40  | M   | Pos | Renal failure*                   | Tenofovir                                            | Possible               | A contributor            | Yes         |
| 5  | 29  | M   | Pos | Renal failure                    | Tenofovir                                            | Possible               | A contributor            | Yes         |
| 6  | 45  | M   | Pos | Renal failure                    | Tenofovir                                            | Possible               | A contributor            | Yes         |
| 7  | 54  | F   | Pos | Renal failure                    | Tenofovir                                            | Possible               | A contributor            | Yes         |
| 8  | 33  | M   | Pos | Renal failure                    | Tenofovir                                            | Possible               | A contributor            | Yes         |
| 9  | 32  | M   | Pos | Renal failure                    | Tenofovir                                            | Possible               | Major contributor        | No          |
| 10 | 23  | F   | Pos | Renal failure                    | Co-trimoxazole                                       | Possible               | A contributor            | No          |
| 11 | 31  | F   | Pos | Renal failure*                   | Co-amoxiclav, ibuprofen                              | Possible               | A contributor            | No          |
| 12 | 39  | M   | Pos | (1) Renal failure                | (1) Ciprofloxacin                                    | (1) Possible           | (1) A contributor        | (1) No      |
|    |     |     |     | (2) Depressed consciousness      | (2) Clonazepam, haloperidol                          | (2) Possible           | (2) A contributor        | (2) No      |
| 13 | 52  | F   | Pos | Renal impairment                 | Tenofovir                                            | Possible               | A contributor            | Yes         |
| 14 | 37  | F   | Pos | Acute kidney injury              | Rifampicin, tenofovir                                | Possible               | Major contributor        | No          |
| 15 | 43  | F   | Pos | Acute kidney injury              | Co-trimoxazole, tenofovir                            | Possible               | Major contributor        | No          |
| 16 | 34  | M   | Pos | (1) Acute kidney injury          | (1) Aciclovir, co-amoxiclav, indomethacin, tenofovir | (1) Possible           | (1) Major contributor    | (1) No      |
|    |     |     |     | (2) Depressed consciousness      | (2) Codeine, tramadol                                | (2) Possible           | (2) Major contributor    | (2) Yes     |

|    |    |   |     |                                            |                                                                      |              |                       |         |
|----|----|---|-----|--------------------------------------------|----------------------------------------------------------------------|--------------|-----------------------|---------|
| 17 | 58 | F | Pos | (1) Acute kidney injury                    | (1) Tenofovir                                                        | (1) Possible | (1) A contributor     | (1) No  |
|    |    |   |     | (2) Drug-induced liver injury              | (2) Co-trimoxazole, rifampicin                                       | (2) Possible | (2) Major contributor | (2) No  |
| 18 | 33 | F | Pos | Drug-induced liver injury & renal failure† | Rifampicin                                                           | Probable     | A contributor         | No      |
| 19 | 44 | M | Pos | Drug-induced liver injury & renal failure  | Co-trimoxazole                                                       | Possible     | A contributor         | Yes     |
| 20 | 39 | F | Pos | Drug-induced liver injury                  | Rifampicin                                                           | Possible     | A contributor         | Yes     |
| 21 | 34 | M | Pos | Drug-induced liver injury                  | Rifampicin                                                           | Probable     | A contributor         | No      |
| 22 | 23 | F | Pos | Drug-induced liver injury                  | Isoniazid, pyrazinamide, rifampicin                                  | Probable     | Major contributor     | No      |
| 23 | 27 | M | Pos | (1) Drug-induced liver injury              | (1) Co-trimoxazole, fluconazole, isoniazid, pyrazinamide, rifampicin | (1) Possible | (1) A contributor     | (1) No  |
|    |    |   |     | (2) Bone marrow suppression                | (2) Co-trimoxazole                                                   | (2) Possible | (2) A contributor     | (2) No  |
| 24 | 37 | F | Pos | (1) Drug-induced liver injury              | (1) Isoniazid, pyrazinamide, rifampicin                              | (1) Possible | (1) Major contributor | (1) Yes |
|    |    |   |     | (2) Hyperkalaemia                          | (2) Spironolactone                                                   | (2) Probable | (2) A contributor     | (2) Yes |
| 25 | 67 | F | Pos | Intracranial bleed                         | Aspirin                                                              | Possible     | Major contributor     | No      |
| 26 | 52 | M | Pos | Lactic acidosis                            | Metformin                                                            | Possible     | A contributor         | Yes     |
| 27 | 53 | M | Pos | Lactic acidosis                            | Stavudine                                                            | Possible     | A contributor         | Yes     |
| 28 | 61 | F | Pos | (1) Lactic acidosis                        | (1) Stavudine                                                        | (1) Probable | (1) Major contributor | (1) No  |
|    |    |   |     | (2) Renal failure                          | (2) Tenofovir                                                        | (2) Possible | (2) A contributor     | (2) No  |
| 29 | 32 | M | Pos | Bone marrow suppression                    | Co-trimoxazole                                                       | Possible     | A contributor         | No      |
| 30 | 60 | M | Pos | Neutropaenia                               | Stavudine                                                            | Possible     | Major contributor     | No      |
| 31 | 65 | F | Pos | (1) Diarrhoea                              | (1) Lopinavir-ritonavir                                              | (1) Possible | (1) A contributor     | (1) No  |
|    |    |   |     | (2) Sodium toxicity                        | (2) 0.9% sodium chloride                                             | (2) Possible | (2) Major contributor | (2) Yes |
| 32 | 65 | F | Unk | Renal failure with hyperkalaemia           | Enalapril                                                            | Possible     | A contributor         | Yes     |

|    |    |   |     |                                       |                                                                       |              |                       |         |
|----|----|---|-----|---------------------------------------|-----------------------------------------------------------------------|--------------|-----------------------|---------|
| 33 | 62 | F | Unk | (1) Renal failure                     | (1) Furosemide                                                        | (1) Possible | (1) A contributor     | (1) Yes |
|    |    |   |     | (2) Anticholinergic effects           | (2) Amitriptyline                                                     | (2) Possible | (2) A contributor     | (2) No  |
| 34 | 51 | M | Unk | Drug-induced liver injury*            | Valproate                                                             | Possible     | A contributor         | No      |
| 35 | 79 | F | Unk | Intracranial bleed                    | Warfarin                                                              | Certain      | Major contributor     | Yes     |
| 36 | 79 | F | Unk | Intracranial bleed                    | Warfarin                                                              | Probable     | Major contributor     | No      |
| 37 | 78 | F | Unk | Intracranial bleed                    | Aspirin                                                               | Possible     | Major contributor     | No      |
| 38 | 55 | F | Unk | Intracranial bleed                    | Heparin                                                               | Possible     | A contributor         | Yes     |
| 39 | 66 | M | Unk | (1) Gastrointestinal bleed            | (1) Aspirin, colchicine, enoxaparin                                   | (1) Possible | (1) Major contributor | (1) Yes |
|    |    |   |     | (2) Hypovolaemia                      | (2) Polyethylene glycol / sodium sulfate                              | (2) Possible | (2) Major contributor | (2) No  |
| 40 | 70 | F | Unk | Hyperkalaemia*                        | Perindopril                                                           | Possible     | A contributor         | No      |
| 41 | 89 | F | Unk | Hypokalaemia                          | furosemide                                                            | Possible     | A contributor         | No      |
| 42 | 80 | M | Unk | Hypokalaemia                          | Sodium polystyrene sulfonate                                          | Certain      | Major contributor     | Yes     |
| 43 | 88 | F | Unk | Hypokalaemia                          | Furosemide, hydrochlorothiazide, prednisone                           | Probable     | Major contributor     | Yes     |
| 44 | 53 | M | Unk | Hypoglycaemia                         | Insulin                                                               | Certain      | A contributor         | Yes     |
| 45 | 22 | M | Unk | Hypoglycaemia                         | Insulin                                                               | Possible     | A contributor         | Yes     |
| 46 | 61 | F | Unk | Hypoglycaemia, stroke                 | Insulin                                                               | Possible     | A contributor         | No      |
| 47 | 74 | F | Unk | (1) Hypoglycaemia                     | (1) Insulin                                                           | (1) Probable | (1) A contributor     | (1) No  |
|    |    |   |     | (2) Masked awareness of hypoglycaemia | (2) Atenolol                                                          | (2) Probable | (2) A contributor     | (2) No  |
|    |    |   |     | (3) Hypotension, stroke               | (3) Amlodipine, atenolol, enalapril, hydralazine, hydrochlorothiazide | (3) Probable | (3) A contributor     | (3) No  |
| 48 | 58 | M | Unk | Hypotension, stroke                   | Furosemide                                                            | Possible     | A contributor         | Yes     |
| 49 | 67 | M | Unk | Hypotension                           | Amlodipine, prazosin                                                  | Possible     | A contributor         | Yes     |

|           |    |   |     |                                                               |                        |              |                   |         |
|-----------|----|---|-----|---------------------------------------------------------------|------------------------|--------------|-------------------|---------|
| <b>50</b> | 76 | F | Unk | Bone marrow suppression, infection                            | Chlorambucil           | Possible     | A contributor     | No      |
| <b>51</b> | 19 | M | Unk | Pneumonia                                                     | Prednisone, tacrolimus | Possible     | A contributor     | No      |
| <b>52</b> | 87 | F | Unk | Diarrhoea                                                     | Rifampicin             | Possible     | A contributor     | No      |
| <b>53</b> | 79 | M | Neg | (1) Renal failure                                             | (1) Furosemide         | (1) Possible | (1) A contributor | (1) Yes |
|           |    |   |     | (2) Atrial fibrillation                                       | (2) Theophyllin        | (2) Possible | (2) A contributor | (2) Yes |
|           |    |   |     | (3) Gastrointestinal bleed                                    | (3) Prednisone         | (3) Possible | (3) A contributor | (3) No  |
| <b>54</b> | 62 | F | Neg | Drug-induced liver injury                                     | Erythromycin           | Possible     | A contributor     | No      |
| <b>55</b> | 55 | F | Neg | Drug reaction with eosinophilia and systemic symptoms (DRESS) | Allopurinol            | Certain      | Major contributor | Yes     |
| <b>56</b> | 29 | M | Neg | Angioedema                                                    | Codeine, ibuprofen     | Possible     | A contributor     | No      |

Neg: HIV-seronegative; Pos: HIV-infected; Unk: HIV serology unknown

\* The panel did not reach consensus: this ADR included as a majority decision

†The panel reached consensus on the assessment of this ADR attributable to rifampicin. Additionally, a majority of the panel considered it possible that the patient's DILI could be attributed to isoniazid and pyrazinamide, and her renal failure to ethambutol.
